# Supplementary material
Source: PubMed Central journal article supplement (PMC2917714)
Supplement: mmc1.pdf [file mmc1.pdf]

The American Journal of Human Genetics, Volume 87

**Supplemental Data**

**A Palindrome-Mediated Recurrent Translocation**

**with 3:1 Meiotic Nondisjunction:**

**The t(8;22)(q24.13;q11.21)**

Molly B. Sheridan, Takema Kato, Chad Haldeman-Englert, G. Reza Jalali, Jeff M. Milunsky, Ying Zou, Ruediger Klaes, Georgio Gimelli, Stefania Gimelli, Robert M. Gemmill, Harry A. Drabkin, April M. Hacker, Julia Brown, David Tomkins, Tamim H. Shaikh, Hiroki Kurahashi, Elaine H. Zackai, and Beverly S. Emanuel

**Table S1. Primer Sequences**

| <b>t(1;22) PCR</b>               |                                      |                                   |                               |
|----------------------------------|--------------------------------------|-----------------------------------|-------------------------------|
| Der(1) t(1;22) Junction Fragment |                                      | Der(22) t(1;22) Junction Fragment |                               |
| Primary Amplification            |                                      | Primary Amplification             |                               |
| 1.6RD                            | GCCTGTGCTCTACAAATGGATCATTGAAGT       | 1.9FA                             | GGTACAAATCACCTTTATACTGGCATACT |
| NF1D                             | AGTGACTTACTACAAATATATTAA             | 22.B1                             | CAAAATTGTGTGAAAAGCCTCCAACGG   |
| Secondary Amplification          |                                      | Secondary Amplification           |                               |
| 1.6RE                            | GAGTGTGACAATCTCATGATGAAACTTCAATGA    | 22.B3                             | GGGGGTGGGGGATGGAACGTTGAAGGATC |
| 22.B2R                           | GGAAGGGAAAAACATGTTAAAAACAAAGAGAGGTAC | 1.9FB                             | CGTTCTGCACATTCTGCACCTGTATCT   |
| <b>t(8;22) PCR</b>               |                                      |                                   |                               |
| Der(8) t(8;22) Junction Fragment |                                      | Der(22) t(8;22) Junction Fragment |                               |
| Primary Amplification            |                                      | Primary Amplification             |                               |
| 8q24-7F                          | CAGTGAGCCAAGATCACGCCATTGCACT         | 22.B1                             | CAAAATTGTGTGAAAAGCCTCCAACGG   |
| 22.B2R                           | GGAAGGGAAAAACATGTTAAAAACAAAGAGAGGTAC | 8q24-7R                           | CCTGATTCCCAAGAAAATGGGCCACTA   |
| Secondary Amplification          |                                      | Secondary Amplification           |                               |
| 8q24-8F                          | AGCCTGGGCAACAGGAGCGAAACTCCAT         | 22.B3                             | GGGGGTGGGGGATGGAACGTTGAAGGATC |
| 22.B4R                           | TGTGGGGTGGGGGATGGAACGTTGAAGGATG      | 8q24-8R                           | CAAAGAGTTGTGAGCTCAGAACAGGCTCT |
| <b>t(8;11) PCR</b>               |                                      |                                   |                               |
| Der(8)t(8;11) Junction Fragment  |                                      | Der(11) t(8;11) Junction Fragment |                               |
| Primary Amplification            |                                      | Primary Amplification             |                               |
| 8q24-7F                          | CAGTGAGCCAAGATCACGCCATTGCACT         | c14irev                           | GGAAGTTAGAGAAAAGTGGAGAA       |
| c14hfor                          | AACACTCCCACTGACAGCTA                 | 8q24-7R                           | CCTGATTCCCAAGAAAATGGGCCACTA   |
| Secondary Amplification          |                                      | Secondary Amplification           |                               |
| 8q24-8F                          | AGCCTGGGCAACAGGAGCGAAACTCCAT         | JFN11                             | CAGAAAGGGAGAGCATGTAG          |
| JFN11.2                          | GGTTGAAGAATCTTGGCTGG                 | 8q24-8R                           | CAAAGAGTTGTGAGCTCAGAACAGGCTCT |
| <b>PATRR8 (Genotyping)</b>       |                                      | <b>PATRR8 (Cloning)</b>           |                               |
| Primary Amplification            |                                      | 8q24-10aFl                        | TTAATTCCATTTTCTTGTACCTTCC     |
| PATRR8-645F                      | CTCCCCTCTAAGTGGCATAAAGTAGAAC         | 8q24-10cR                         | CCATCTATCCACCTTATTTCAGC       |
| PATRR8+227R                      | CTGTGCCAAAATGTCAAGTCATCTGTG          |                                   |                               |
| Secondary Amplification          |                                      |                                   |                               |
| PATRR8-203F                      | CAGTGAGCCAAGATCACGCCATTGC            |                                   |                               |
| PATRR8+103R                      | CAAAGAGTTGTGAGCTCAGAACAGGC           |                                   |                               |

**Table S2. PATRR8 Genotyping**

| <b>Case</b> | <b>Total # of Clones</b> | <b># of Unique Clones</b> | <b>PATRR8 Size Range</b> | <b>PATRR8 Average Length</b> | <b><math>\Delta G</math> Range</b> |
|-------------|--------------------------|---------------------------|--------------------------|------------------------------|------------------------------------|
| 13          | 60                       | 46                        | 40-393 bp                | 229 bp                       | -90.7→-3.14                        |
| 16          | 54                       | 38                        | 107-327 bp               | 252 bp                       | -93.99→-26.75                      |
| 17          | 82                       | 58                        | 123-370 bp               | 279 bp                       | -80.22→-15.57                      |
| Chr8 Hybrid | 97                       | 60                        | 127-378 bp               | 236 bp                       | -98.37 →-24.55                     |

**Figure S1. M-Fold Analysis of PATRR8 Secondary Structure Assembled from t(8;22) Junction Fragments**

The secondary structures of the PATRR8 derived from t(8;22) junction fragments with the lowest free energy from three t(8;22) balanced carriers are illustrated.

**Case 13 PATRR8**

T

ATATATATATTAAAAATATATATATTTAAATATATATATTTTAAATATGTATATTTAAATTATATAAATTTAAATATATA TTAATATACATATTTAATATATATAAATTTAATATATATCTT A

TATATATATAAATTTTATATATATAAATTTATATATATAAAAAATTTATACATATAAATTTAATATATTTAAATTTATATATAAATTTATATGTATAAAATTATATATA TAAAT TATATATAGAA T

A

**Cases 16 and 17 PATRR8**

T

AAATATATATATTTAAAAATATATATATTTAAAAATATATATTTAAATATATATATCTTTAAATATGTATATTTAAATTTATATAAATTTAAATATATATAAATTTAATATACATATTTAATATATATAAATTTAATATATATCTT A

TTTATATATATATAAATTTTATATATAAATTTTATATATATAAATTTATATATATAGAAATTTATACATATAAATTTAATATATTTAAATTTATATATAAATTTATATGTATAAAATTATATATA TAAATTTATATATAGAA T

A
